# Supplementary material for: Oxygen vacancies confined in Co3O4 quantum dots for promoting oxygen evolution electrocatalysis
Source: Royal Society of Chemistry journal article supplement (doi:10.1039/c9qi00325h), 2019-01-01
Supplement: c9qi00325h1.pdf [file c9qi00325h1.pdf]

## Supporting Information

### **Oxygen Vacancies Confined in Co<sub>3</sub>O<sub>4</sub> Quantum Dots for Promoted Oxygen Evolution Electrocatalysis**

*Yun Tong,\* Hainiao Mao, Yanglei Xu and Jiyang Liu*

Department of Chemistry, School of Sciences, Zhejiang Sci-Tech University, 928 Second Avenue, Xiasha High Education Zone, Hangzhou 310018, (P. R. China)

Correspondence and requests for materials should be addressed to Y. Tong (E-mail:

[tongyun@mail.ustc.edu.cn](mailto:tongyun@mail.ustc.edu.cn))

## Table of Contents

|                                                                                                                          |   |
|--------------------------------------------------------------------------------------------------------------------------|---|
| S1. Crystal structure of pristine $\text{Co}_3\text{O}_4$ and oxygen defected $\text{Co}_3\text{O}_4$ quantum dots ..... | 3 |
| S2. TEM image and size distribution of P- $\text{Co}_3\text{O}_4$ quantum dots .....                                     | 3 |
| S3. HRTEM image of P- $\text{Co}_3\text{O}_4$ quantum dots.....                                                          | 4 |
| S4. The XRD patterns of various $\text{Co}_3\text{O}_4$ products at different temperature .....                          | 4 |
| S5. X-ray photoelectron spectroscopy investigation of P- $\text{Co}_3\text{O}_4$ sample.....                             | 5 |
| S6. X-ray photoelectron spectroscopy investigation of $\text{Co}_3\text{O}_4$ -200 .....                                 | 5 |
| S7. The Co 2p XPS spectra of various $\text{Co}_3\text{O}_4$ samples.....                                                | 6 |
| S8. The stability test of $\text{Co}_3\text{O}_4$ -200 for OER process .....                                             | 6 |
| S9. The stability test of $\text{Co}_3\text{O}_4$ -170 for OER process .....                                             | 7 |

## S1. Crystal structure of pristine $\text{Co}_3\text{O}_4$ and oxygen defected $\text{Co}_3\text{O}_4$ quantum dots

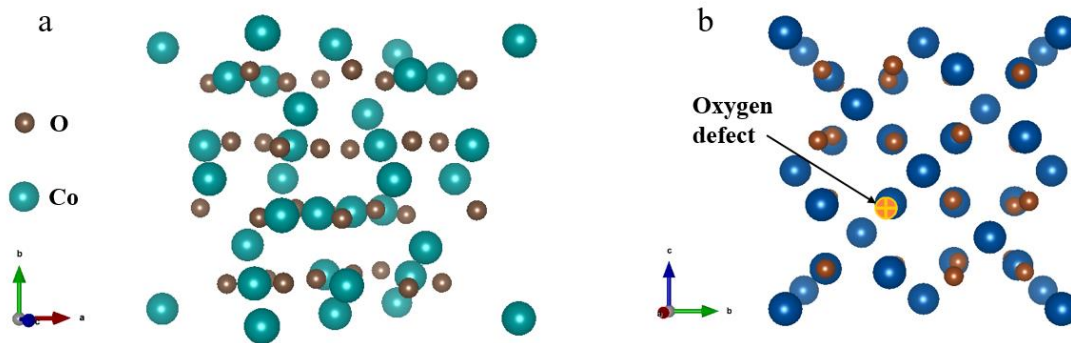

Figure S1 (a) The crystal structure of p- $\text{Co}_3\text{O}_4$  sample. (b) The schematic diagram of oxygen defects in the framework of  $\text{Co}_3\text{O}_4$  material.

## S2. TEM image and size distribution of p- $\text{Co}_3\text{O}_4$ quantum dots

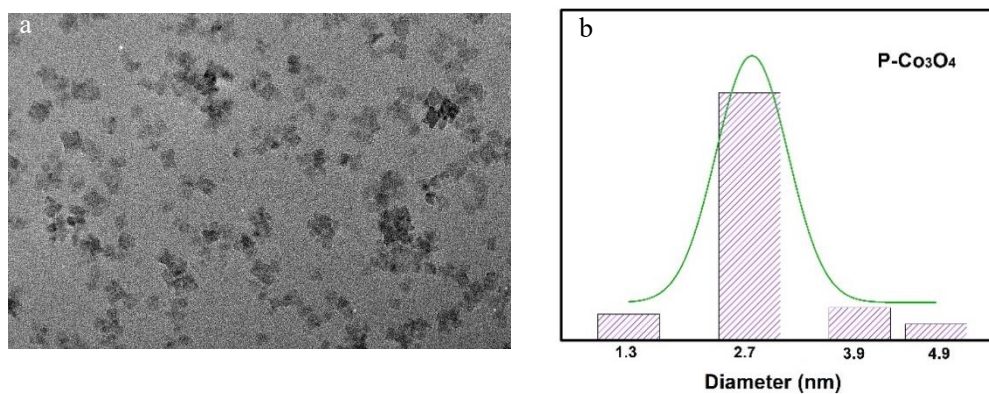

Figure S2 (a) TEM image of the obtained pristine  $\text{Co}_3\text{O}_4$  quantum dots. (b) Distribution diagram of particle size of pristine  $\text{Co}_3\text{O}_4$  quantum dots.

### S3. HRTEM image of p-Co<sub>3</sub>O<sub>4</sub> quantum dots

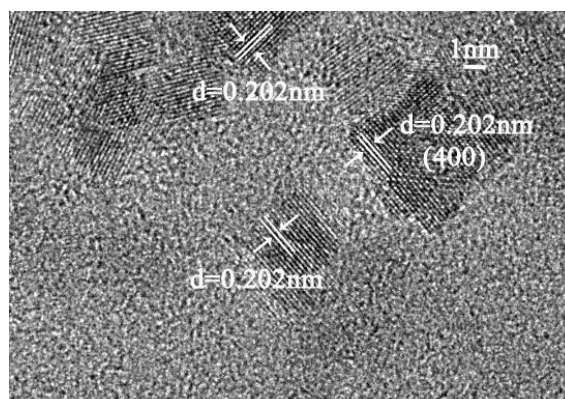

Figure S3 The HRTEM image of synthesized pristine Co<sub>3</sub>O<sub>4</sub> quantum dots.

### S4. The XRD patterns of various Co<sub>3</sub>O<sub>4</sub> products at different temperature

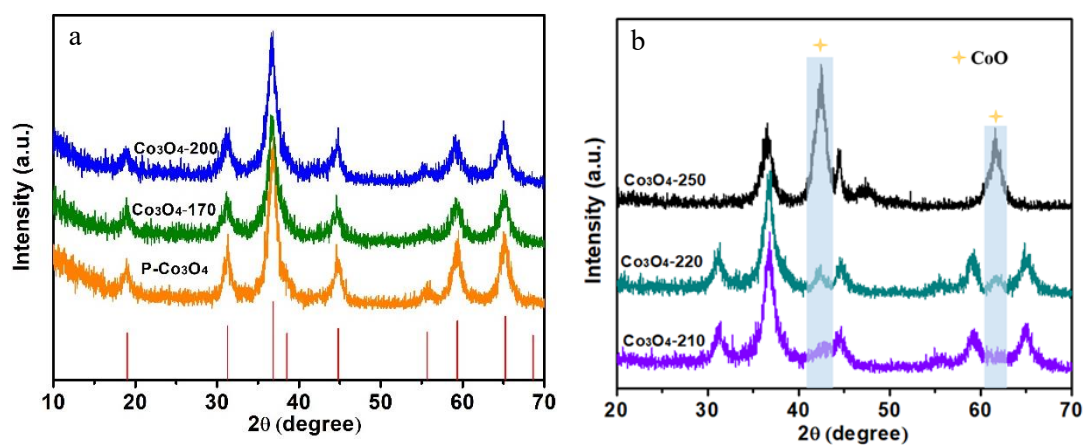

Figure S4 a-b) XRD patterns of as-obtained various Co<sub>3</sub>O<sub>4</sub> quantum dots that synthesized at different treatment temperature.

### S5. X-ray photoelectron spectroscopy investigation of p-Co<sub>3</sub>O<sub>4</sub> sample

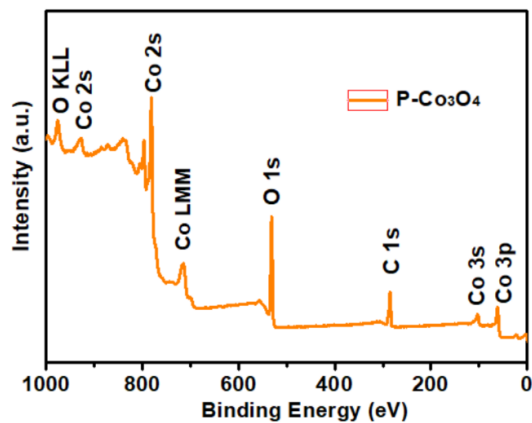

Figure S5 The XPS survey of as-obtained p-Co<sub>3</sub>O<sub>4</sub> products.

### S6. X-ray photoelectron spectroscopy investigation of Co<sub>3</sub>O<sub>4</sub>-200

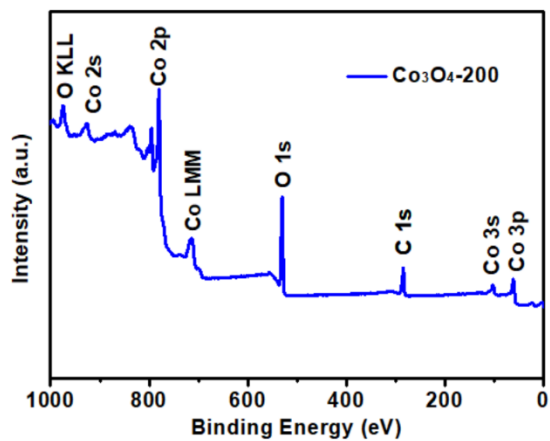

Figure S6 The XPS survey of as-obtained Co<sub>3</sub>O<sub>4</sub>-200 products.

### S7. The Co 2p XPS spectra of various Co<sub>3</sub>O<sub>4</sub> samples

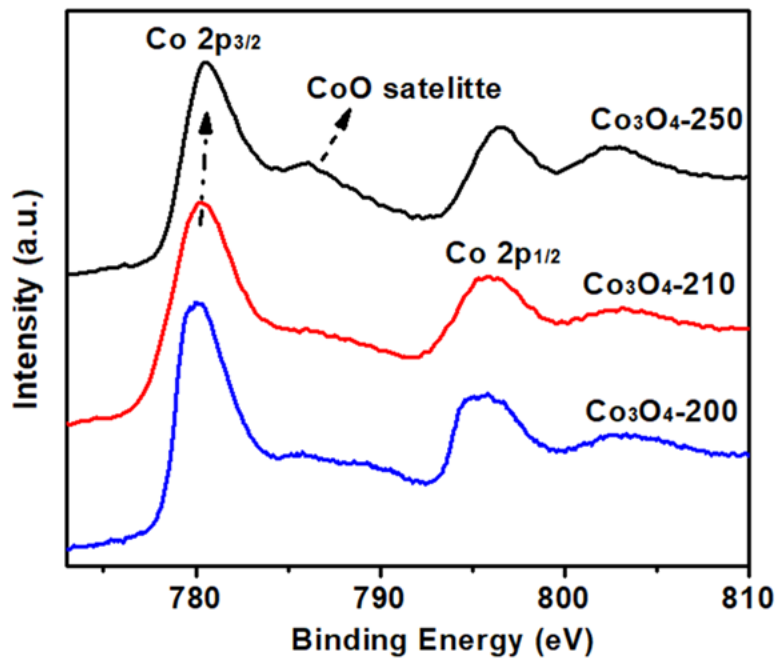

Figure S7 The Co2p XPS survey of as-obtained Co<sub>3</sub>O<sub>4</sub>-200, Co<sub>3</sub>O<sub>4</sub>-210 and Co<sub>3</sub>O<sub>4</sub>-250 products.

### S8. The stability test of Co<sub>3</sub>O<sub>4</sub>-200 for OER process

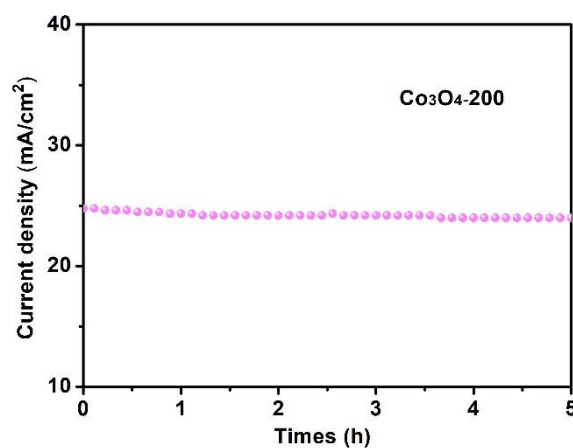

Figure S8 Chronoamperometric response of Co<sub>3</sub>O<sub>4</sub>-200 catalyst at the applied potential of 0.55V vs. Ag/AgCl.

### S9. The stability test of Co<sub>3</sub>O<sub>4</sub>-170 for OER process

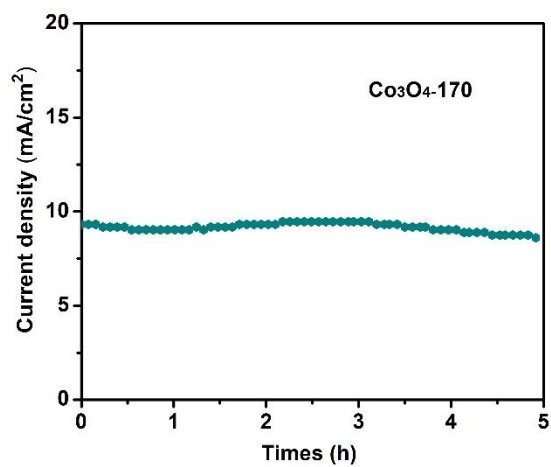

Figure S9 Chronoamperometric response of Co<sub>3</sub>O<sub>4</sub>-170 catalyst at the applied potential of 0.55V vs. Ag/AgCl.
